# Supplementary material for: Quantification of Female Chimeric Cells in the Tonsils of Male Children and Their Determinants
Source: MDPI journal article supplement (doi:10.3390/cells12162116), 2023-08-21
Supplement: s1 [file s1]

**Supplementary Table S1:** Comparative Children characteristics, by female cell detection in sample

| Characteristics                    | No female cells detected | Female cells detected | p-value |
|------------------------------------|--------------------------|-----------------------|---------|
|                                    | n(%) or Med[IQR]         | n(%) or Med[IQR]      |         |
| Age of the child, in years         | 3.5 [2-4.5]              | 4.5 [4-6]             | 0.038°  |
| BMI*, in kg/m <sup>2</sup>         | 16.2 [15.1-16.7]         | 15.3 [14.8-19]        | 0.808   |
| BMI*                               |                          |                       | 0.292   |
| Normal                             | 11 (78.6)                | 13 (59.1)             |         |
| Abnormal (under- or over- weight)  | 3 (21.4)                 | 9 (40.9)              |         |
| Pre-term births                    |                          |                       |         |
| Pre-term (36 weeks or prior)       | 1 (6.3)                  | 5 (22.7)              | 0.370   |
| >36 weeks                          | 15 (93.8)                | 17 (77.3)             |         |
| Breastfeeding                      |                          |                       |         |
| Yes                                | 11 (68.8)                | 17 (77.3)             | 0.713   |
| No                                 | 5 (31.3)                 | 5 (22.7)              |         |
| Breastfeeding class                |                          |                       |         |
| 0                                  | 5 (31.3)                 | 5 (22.7)              |         |
| Colostrum (<5 days)                | 4 (25.0)                 | 2 (9.1)               | 0.444   |
| Inter. milk (6 days to 1 month)    | 1 (6.3)                  | 3 (13.6)              |         |
| Mature milk (>1 month)             | 6 (37.5)                 | 12 (54.6)             |         |
| Breastfeeding duration, in days    | 1.5 [0-65.6]             | 83.6 [0.5-182.5]      | 0.107   |
| First born                         |                          |                       |         |
| Yes                                | 7 (43.8)                 | 13 (59.1)             | 0.512   |
| No                                 | 9 (56.3)                 | 9 (40.9)              |         |
| Mother's age at birth <sup>†</sup> | 32.5 [27.5-33.5]         | 31 [27-33]            | 0.517   |

Abbreviations: IQR, Interquartile range; BMI, Body mass index. \*2 missing values, †1 missing value, °statistically significant.

**Supplementary Table S2.** Sensitivity analysis for final multivariate model for female cell density, per 100,000 male cells, with two eldest participants removed from the model (n = 20).

| Characteristics                       | IRR (95% CI)      | p-Value  |
|---------------------------------------|-------------------|----------|
| Child age, in years                   | 0.71 (0.60; 0.84) | <0.001 ° |
| Breastfeeding                         |                   | 0.677    |
| Yes                                   | 1.30 (0.38; 4.48) |          |
| No                                    | Ref.              |          |
| Interaction breastfeeding * child age | 1.17 (0.89; 1.54) | 0.269    |
| First born                            |                   | 0.014 °  |
| Yes                                   | Ref.              |          |
| No                                    | 1.87 (1.13; 3.10) |          |
| Child BMI, in kg/m <sup>2</sup>       | 1.03 (0.98; 1.08) | 0.226    |
| Breastfeeding duration, in days       | 1.00 (1.00; 1.00) | 0.169    |

Based on a Poisson regression, with a breastfeeding and child age interaction term and adjusted for sibling rank, BMI, and breastfeeding duration. Abbreviations: IRR, incidence rate ratio; CI, confidence interval; BMI, body mass index; kg/m<sup>2</sup>, kilograms per meter squared. ° Statistically significant.
